# Supplementary material for: Quality of life in subjects with upper- and lower-limb spasticity treated with incobotulinumtoxinA
Source: PubMed Central journal article supplement (PMC7055124; doi:10.1186/s12955-020-01304-4), 2020-03-04
Supplement: 12955_2020_1304_MOESM1_ESM.pdf [file 12955_2020_1304_MOESM1_ESM.pdf]

## Additional file 1

Fig. S1 Subject disposition

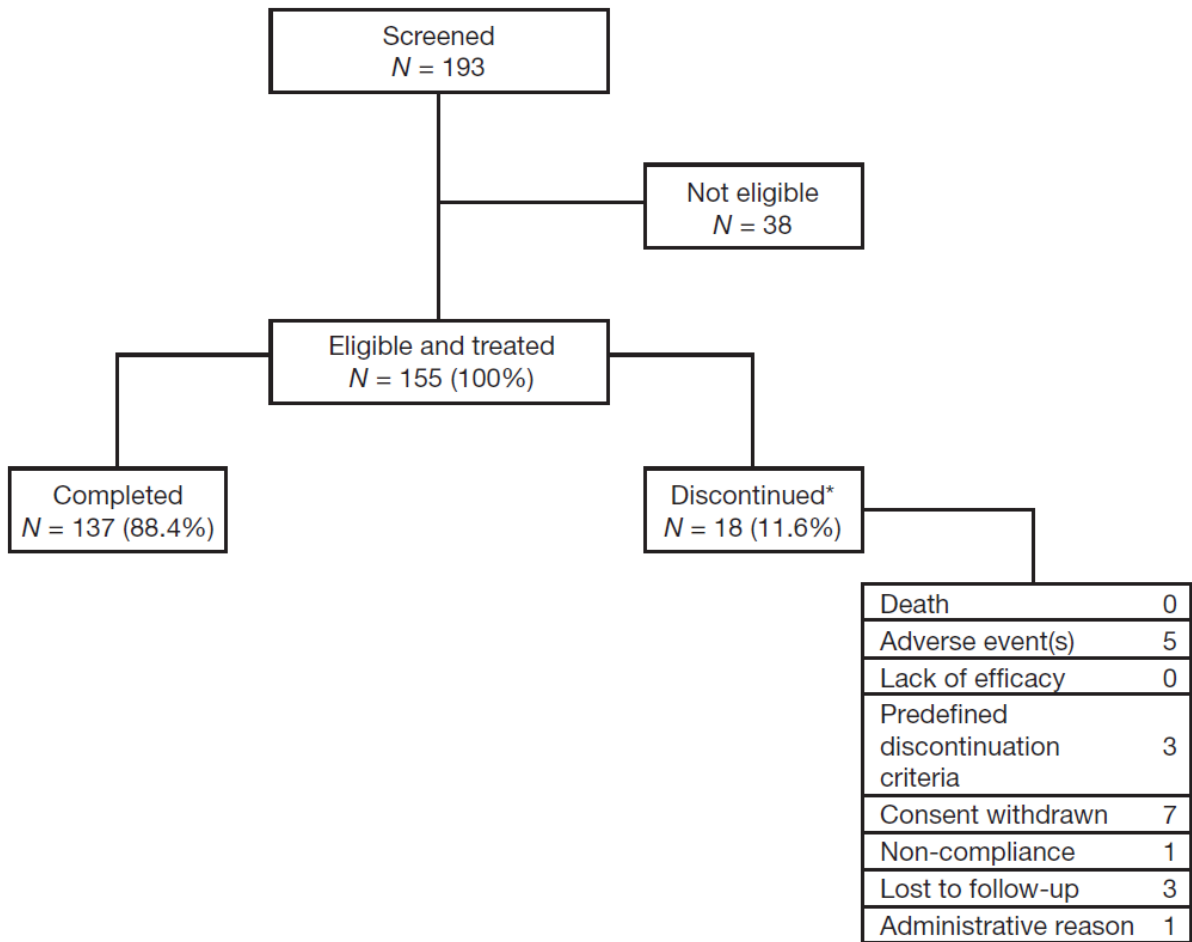

\*multiple entries possible
